# Supplementary material
Source: Springer Nature journal article supplement (https://www.springermedizin.de/resource/supplementary/12884_2012_607_MOESM9_ESM.pdf/9457810)

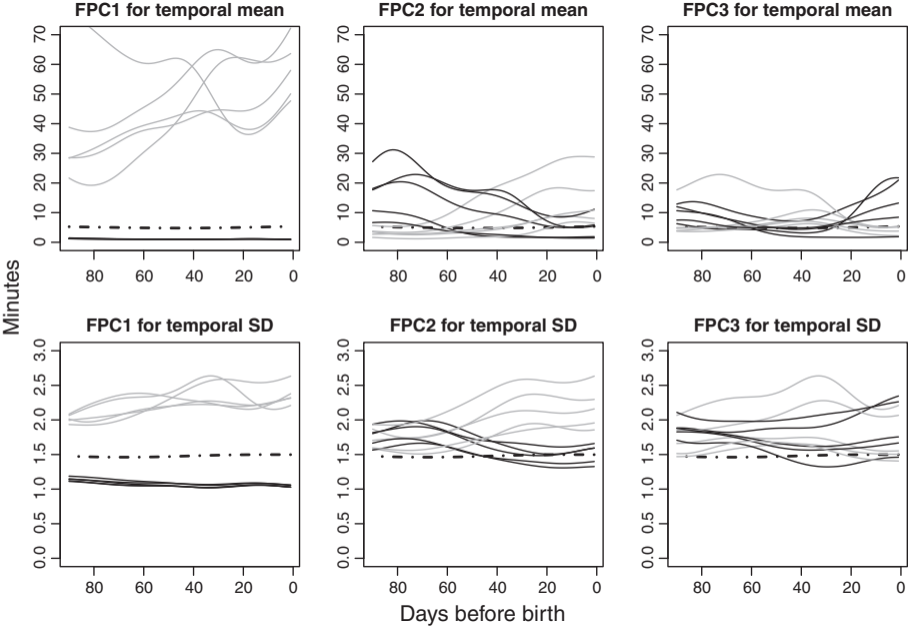

Supplement: MOESM9 [file 9457810]
